# Supplementary material for: Selective production of bicyclic alkanes as high-density fuel additives by coupling lignocellulose-derived furanics and phenolics
Source: Royal Society of Chemistry journal article supplement (doi:10.1039/d4gc00105b), 2024-01-01
Supplement: d4gc00105b1.pdf [file d4gc00105b1.pdf]

## Supplementary Information

### Selective production of bicyclic alkanes as high-density fuel additives by coupling lignocellulose-derived furanics and phenolics

Shumin Huang<sup>a</sup>, Xiaolin Luo<sup>a</sup>, Ji Li<sup>b,c</sup>, Sibao Liu<sup>d</sup>, Li Shuai<sup>a,\*</sup>

<sup>a</sup> *College of Materials Engineering, Fujian Agriculture and Forestry University,  
Fuzhou 350002, Fujian, China*

<sup>b</sup> *School of Aeronautic Science and Engineering, Beihang University, Beijing 100191,  
China*

<sup>c</sup> *Chengdu Aeronautic Polytechnic, Chengdu 610100, Sichuan, China.*

<sup>d</sup> *Key Laboratory for Green Chemical Technology of Ministry of Education, School of  
Chemical Engineering and Technology, Tianjin University, Tianjin 300072, China*

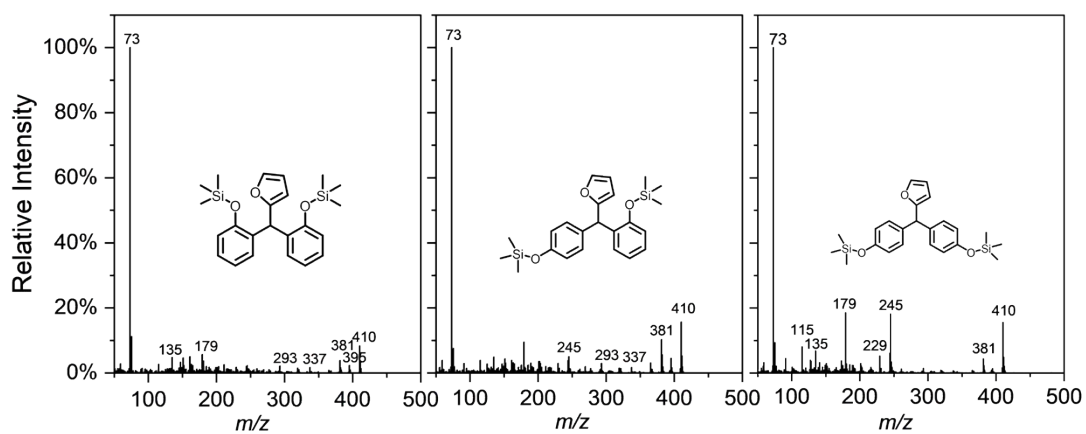

**Fig. S1.** GC-MS of FPP-PF and its isomers.

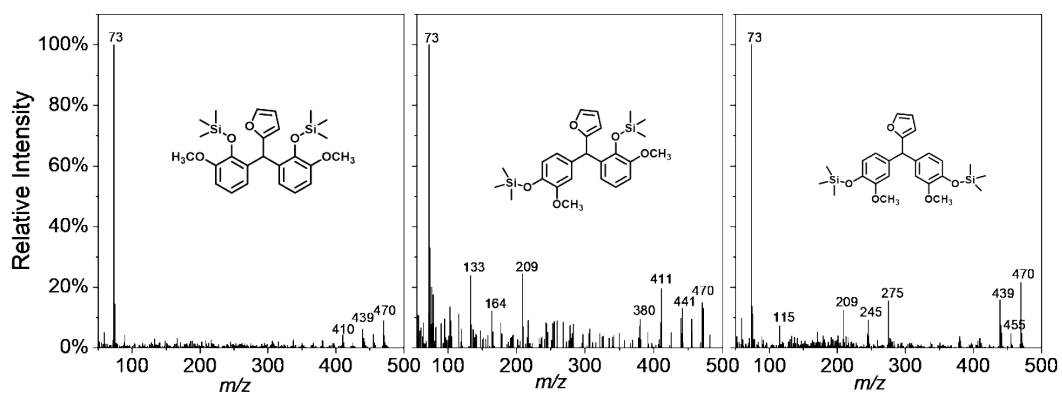

**Fig. S2.** GC-MS of FPP-GF and its isomers..

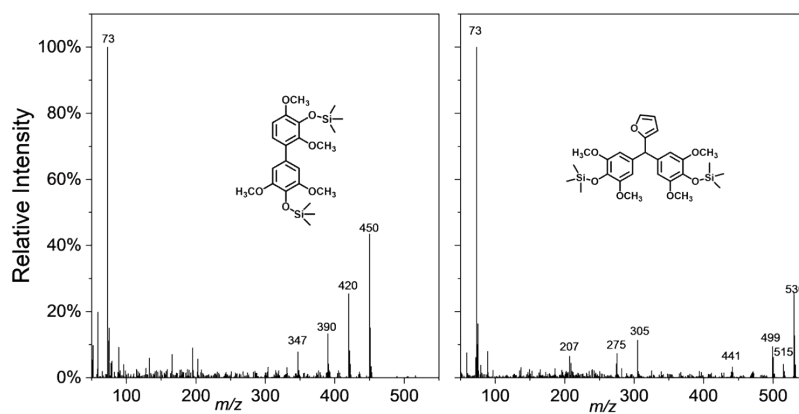

**Fig. S3.** GC-MS of syringol self-coupling product and FPP-SF.

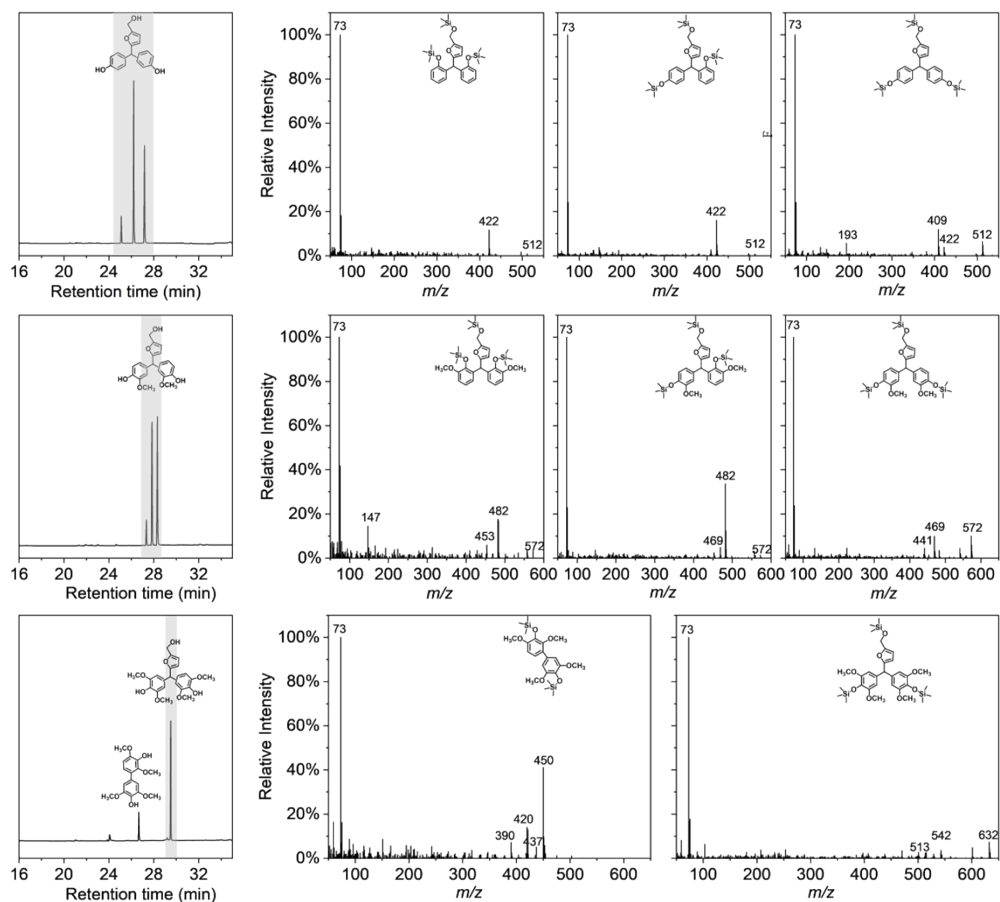

**Fig. S4.** GC chromatograms and GC-MS mass of FPP-PH, FPP-GH, and FPP-SH.

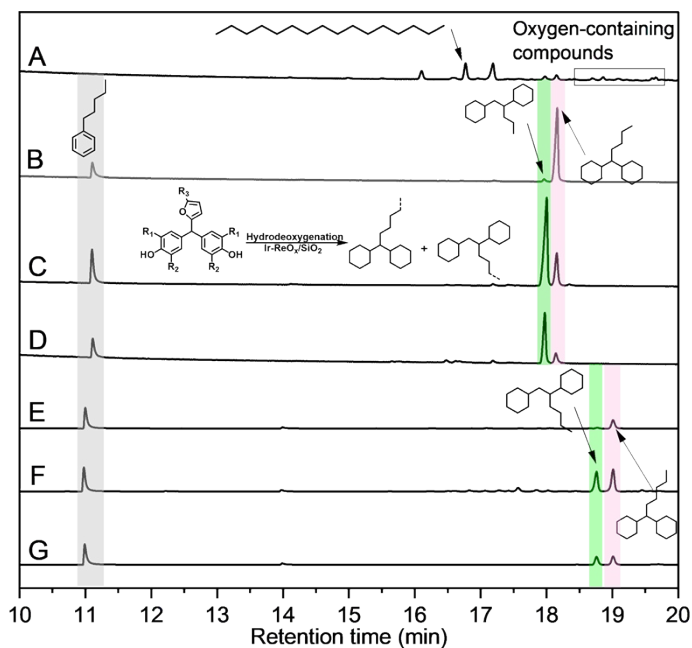

**Fig. S5.** Chromatograms of HDO products of FPPs. (A) FPP-SF, HDO conditions: Pd/C and  $\text{H}_3\text{PO}_4$ , 250 °C; (B) FPP-PF, HDO conditions: Ir-ReO<sub>x</sub>/SiO<sub>2</sub>, 180 °C; (C) FPP-GF, HDO conditions: Ir-ReO<sub>x</sub>/SiO<sub>2</sub>, 180 °C; (D) FPP-SF, HDO conditions: Ir-ReO<sub>x</sub>/SiO<sub>2</sub>, 200 °C; (E) FPP-PH, HDO

conditions: Ir-ReO<sub>x</sub>/SiO<sub>2</sub>, 200 °C; (F) FPP-GH, HDO conditions: Ir-ReO<sub>x</sub>/SiO<sub>2</sub>, 200 °C; (G) FPP-SH, HDO conditions: Ir-ReO<sub>x</sub>/SiO<sub>2</sub>, 200 °C.

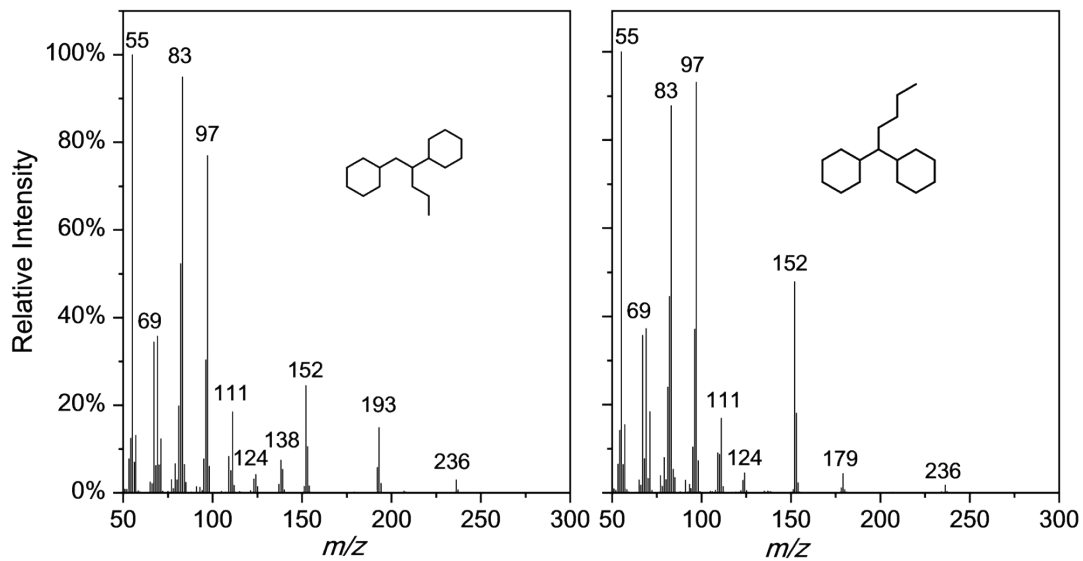

Fig. S6: GC-MS of C17-BCA.

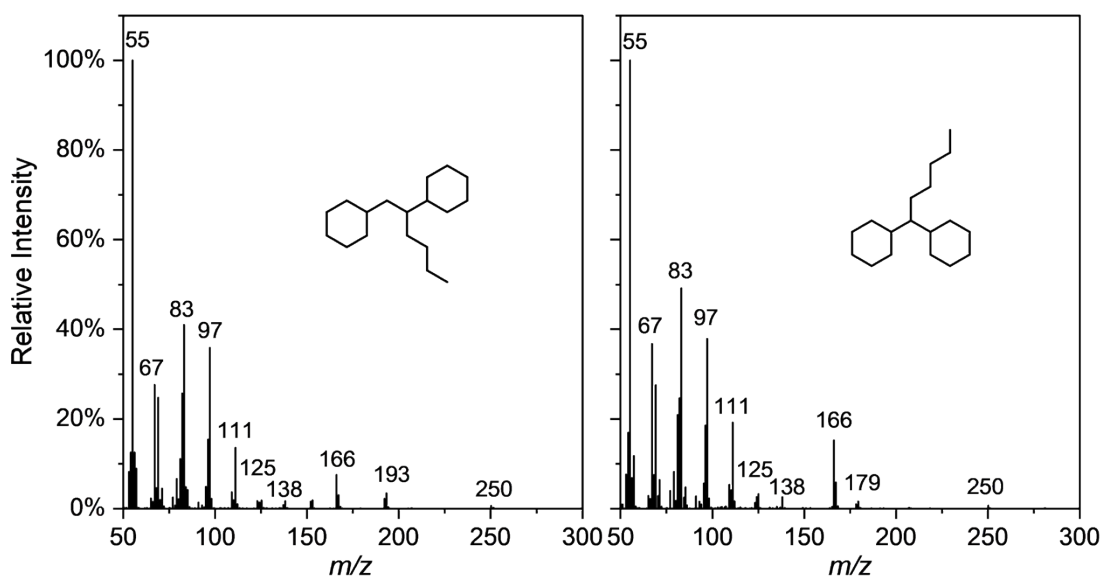

Fig. S7: GC-MS of C18-BCA.

**Tab. S1** Parametric optimization of phenol-furfural coupling

| Phenol/furfural (mol) | Temperature (°C) | NaOH (mg) | Reaction time (h) | FPP-PF yield |
|-----------------------|------------------|-----------|-------------------|--------------|
| 16/1                  | 80               | 10        | 4                 | 11.1%        |
| 16/1                  | 80               | 10        | 8                 | 25.1%        |
| 16/1                  | 80               | 10        | 12                | 41.9%        |
| 16/1                  | 80               | 10        | 24                | 56.3%        |
| 16/1                  | 80               | 10        | 48                | 67.0%        |

**Tab. S2** Parametric optimization of HDO of FPP

| Time (h)        | Temperature (°C) | Catalyst                                | BCA yield |
|-----------------|------------------|-----------------------------------------|-----------|
| 6 <sup>a</sup>  | 250              | Pd/C and H <sub>3</sub> PO <sub>4</sub> | 24.9%     |
| 12 <sup>a</sup> | 180              | Pd/C and H <sub>3</sub> PO <sub>4</sub> | 18.2%     |
| 6 <sup>a</sup>  | 250              | Ru/C and H <sub>3</sub> PO <sub>4</sub> | <10.0%    |
| 6 <sup>a</sup>  | 250              | Pt/C and H <sub>3</sub> PO <sub>4</sub> | <10.0%    |
| 6 <sup>a</sup>  | 200              | Ir-Re/SiO <sub>2</sub>                  | 48.0%     |
| 18 <sup>b</sup> | 200              | Ir-Re/SiO <sub>2</sub>                  | 86.8%     |
| 18 <sup>c</sup> | 200              | Ir-Re/SiO <sub>2</sub>                  | 94.2%     |
| 18 <sup>d</sup> | 200              | Ir-Re/SiO <sub>2</sub>                  | 90.0%     |
| 18 <sup>e</sup> | 200              | Ir-Re/SiO <sub>2</sub>                  | 90.7%     |

<sup>a</sup> 100 mg catalyst, 100 mg FPP; <sup>b</sup> 50 mg catalyst, 100 mg FPP; <sup>c</sup> the first recycling of Ir-Re/SiO<sub>2</sub>; <sup>d</sup> the second recycling of Ir-Re/SiO<sub>2</sub>; <sup>e</sup> the third recycling of Ir-Re/SiO<sub>2</sub>.

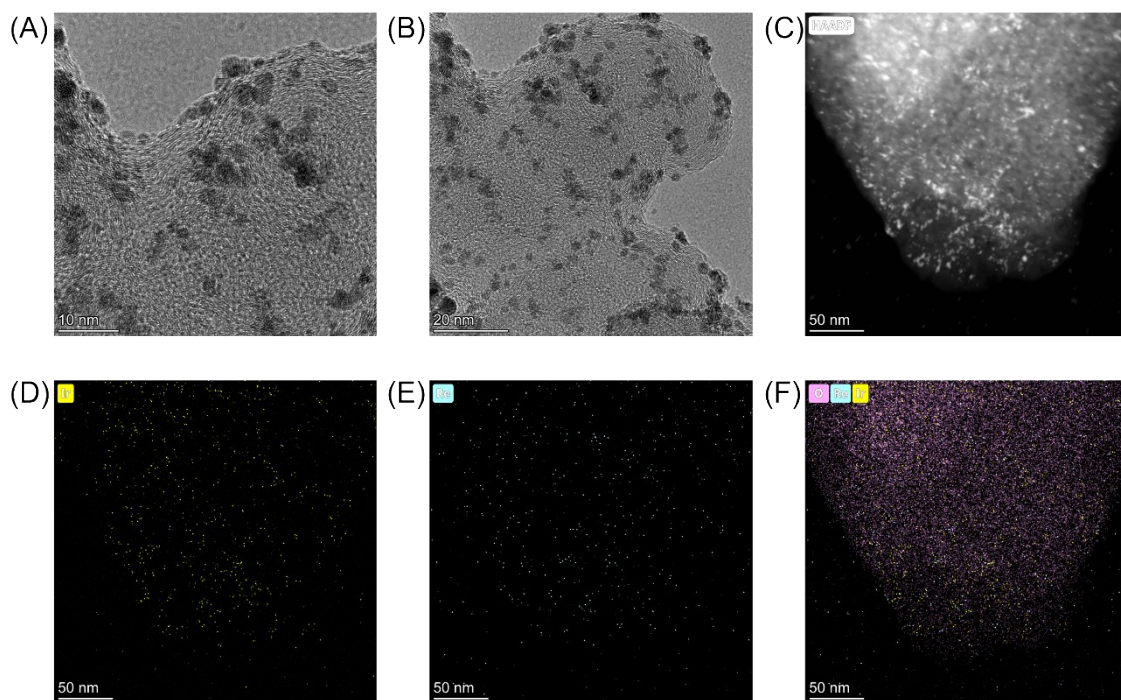

**Fig. S8** (A) and (B) TEM image of Ir-ReO<sub>x</sub>/SiO<sub>2</sub>; (C), (D), (E) and (F) EDX mapping of Ir-ReO<sub>x</sub>/SiO<sub>2</sub>.

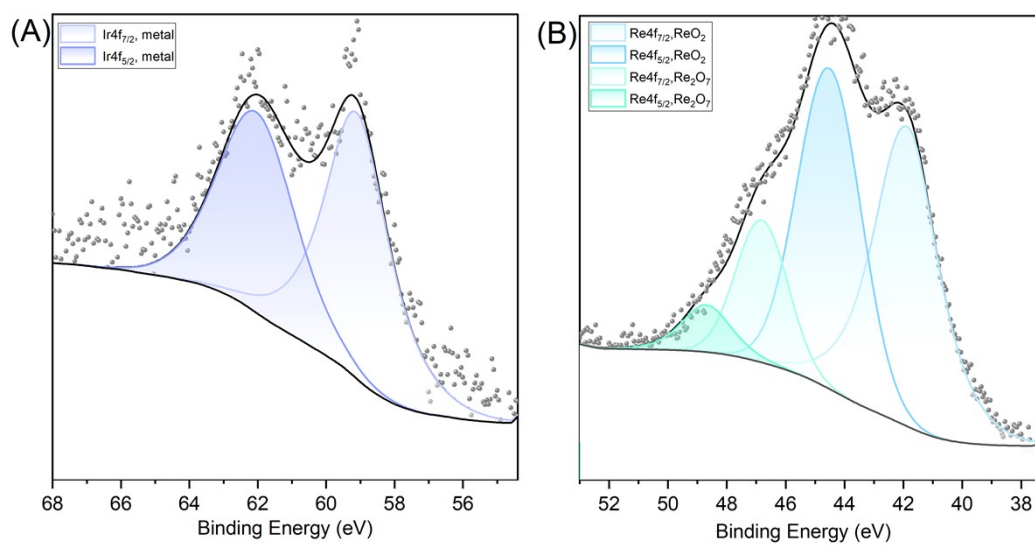

**Fig. S9** XPS spectra of the Ir-ReO<sub>x</sub>/SiO<sub>2</sub>. (A) High-resolution Ir spectra of Ir-ReO<sub>x</sub>/SiO<sub>2</sub>; (B) High-resolution Re spectra of Ir-ReO<sub>x</sub>/SiO<sub>2</sub>.

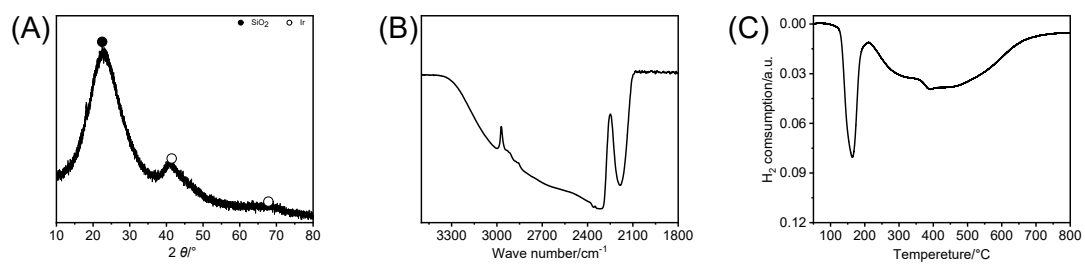

**Fig. S10** (A) XRD Patterns of the Ir-ReO<sub>x</sub>/SiO<sub>2</sub>. (B) DRIFT spectra of CO adsorbed on the Ir-ReO<sub>x</sub>/SiO<sub>2</sub> after the reduction at 200 °C. (C) TPR profiles of Ir-ReO<sub>x</sub>/SiO<sub>2</sub>. Conditions: sample (50 mg, calcined at 500 °C for 3 h) and H<sub>2</sub>/Ar (10% v/v, 50 ml/min) at a heating rate of 10 °C /min.
